# Supplementary material
Source: PubMed Central journal article supplement (PMC3148017)
Supplement: NIHMS304351-supplement-304351.pdf [file NIHMS304351-supplement-304351.pdf]

1  
2  
3  
4  
5  
6  
7  
8  
9  
10  
11  
12  
13  
14  
15  
16  
17  
18  
19  
20

**Supporting Information**

**Environmental and biological monitoring of exposures to PAHs and ETS  
in the general population**

**Noel J. Aquilina, Juana Mari Delgado Saborit, Claire Meddings, Stephen Baker, Roy  
M. Harrison, Peyton Jacob III, Margaret Wilson, Lisa Yu, Minjiang Duan and  
Neal L. Benowitz**

**Number of Pages: 9**

**Number of Tables: 6**

**Number of Figures: 1**

## 1 Quality Assurance – Quality Control on Sampling

2 For the quality assurance and quality control (QA-QC) on PAH sampling, 6% of the samples were  
3 taken as Field Blanks (FB) and Travel and Exposure Blanks (TEB). A FB was defined as a filter or  
4 sorbent tube blank that has been connected to the pump and undergone through the calibration process,  
5 has been subsequently disconnected from the pump and placed back in a metal tin (filter) or capped with  
6 Swagelok caps (sorbent tube), and carried to the sampling site, exposed to the sampling conditions  
7 without opening the metal tin (filters) or caps (sorbent tubes). A TEB was defined as a clean filter or  
8 sorbent tube sample enclosed in a metal tin (filter) or capped with Swagelok caps (sorbent tube), carried  
9 to the sampling site and returned to the lab without opening the metal tin (filters) or Swagelok caps  
10 (sorbent tubes) and treated as an environmental sample. In both occasions, FB and TEB, the filter  
11 enclosed in a metal tin or sorbent tube capped, was placed in the sampler during the travel time, left in the  
12 sampler during the sampling period and was returned to the lab without being opened at all. The  
13 difference between both blanks is that the FB sample was connected to the pump and underwent also the  
14 calibration with the rotameter. The average and standard deviation of the different types of blanks are  
15 shown in Table S1.

16 **Table S1:** Analytical limits - Sampling blanks

| Compound                                             | Travel and Exposure Blank |      | Field Blank |      |
|------------------------------------------------------|---------------------------|------|-------------|------|
|                                                      | Average                   | STD  | Average     | STD  |
| <b>GAS PHASE VOCS (ng)</b>                           |                           |      |             |      |
| 3-Ethenylpyridine                                    | 0.56                      | 1.0  | 0.73        | 0.82 |
| Naphthalene                                          | 5.69                      | 3.6  | 6.05        | 3.49 |
| 1,3-Butadiene                                        | 0.65                      | 0.90 | 1.22        | 2.46 |
| <b>PARTICULATE PHASE PAHS (pg/<math>\mu</math>L)</b> |                           |      |             |      |
| Acenaphthylene                                       | 27.9                      | 23.9 | 6.6         | 2.1  |
| Acenaphthene                                         | 36.1                      | 18.8 | 24.9        | 16.8 |
| Fluorene                                             | 104.3                     | 98.1 | 29.9        | 15.4 |
| Phenanthrene                                         | 139.2                     | 49.1 | 30.6        | 5.4  |
| Anthracene                                           | 10.6                      | 7.3  | 4.7         | 1.9  |
| Fluoranthene                                         | 11.4                      | 1.1  | 4.1         | 0.9  |
| Pyrene                                               | 36.4                      | 5.9  | 4.8         | 3.3  |
| Benz(a)anthracene                                    | 1.6                       | 0.4  | 1.4         | 1.3  |
| Chrysene                                             | 5.8                       | 0.2  | 1.9         | 0.3  |
| Benzo(b)fluoranthene                                 | 2.1                       | 1.5  | 0.8         | 0.7  |
| Benzo(k)fluoranthene                                 | 1.6                       | 0.9  | 0.9         | 0.3  |
| Benzo(a)pyrene                                       | 3.5                       | 1.8  | 4.0         | 2.2  |
| Indeno(1,2,3-cd)pyrene                               | 4.9                       | 2.4  | 3.8         | 2.2  |
| Dibenz(ah)anthracene                                 | 1.1                       | 0.2  | 0.9         | 0.4  |
| Benzo(ghi)perylene                                   | 7.2                       | 1.3  | 2.6         | 0.8  |
| Coronene                                             | 2.4                       | 1.4  | 0.5         | 0.3  |

17

1 To assess the precision of the measurements, duplicates equivalent to 3% of the samples were taken;  
2 these refer to two samples taken in the same environment for the same time period. The duplicate samples  
3 were also analysed altogether in the same batch to assess the total variance of the sampling and analytical  
4 procedure. Figure S1 shows the correlation of some representative compounds for PAH and VOC and  
5 illustrates that duplicate samples show an excellent agreement within 15% between concurrently collected  
6 samples.

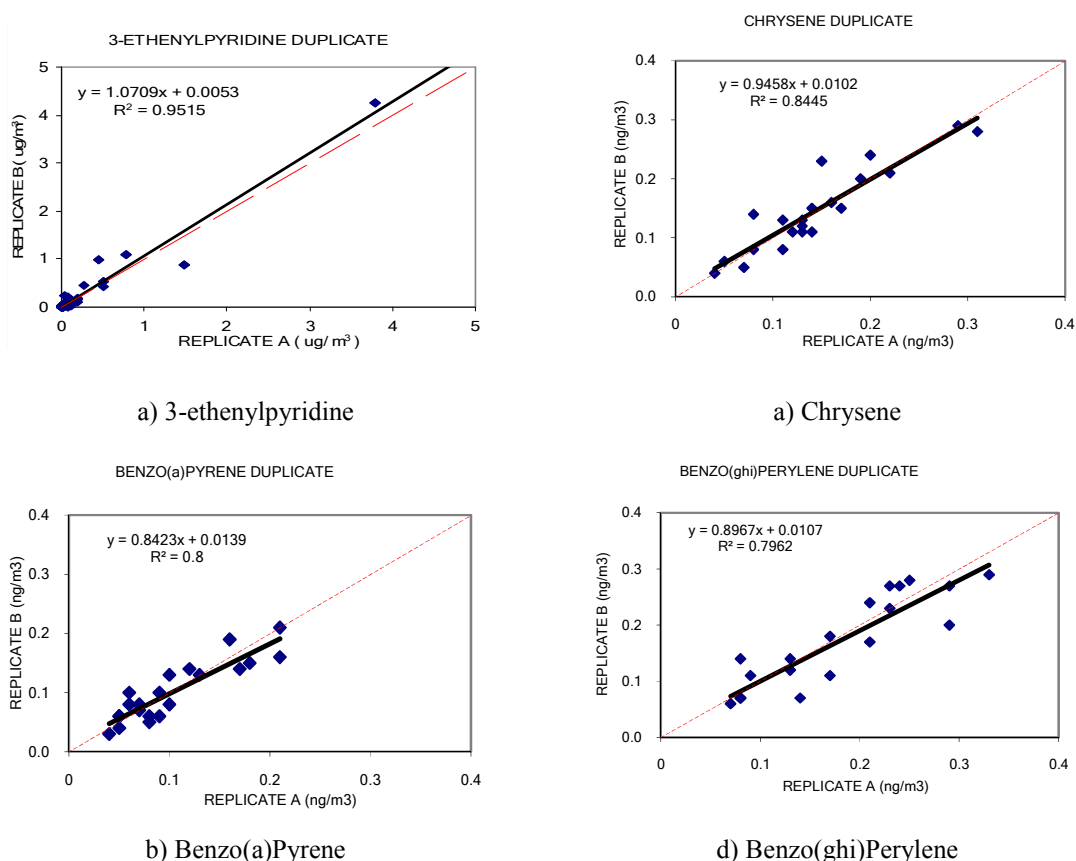

7 **Figure S1:** Field duplicate samples for (a) 3-ethenylpyridine, (b) chrysene, (c) benzo(a)pyrene and (d)  
8 benzo(ghi)perylene

9  
10 The flow rates of all the pumps were calibrated with rotameters, covering the appropriate range of  
11 flow rate values, before and after the sampling period. The average value of both measurements was used  
12 in calculations. The sample was considered invalid when there was a deviation of greater than 30%  
13 between the start and the end flowrate. The average deviation between the start and the end of the  
14 sampling period was  $6 \pm 17\%$  for the VOC sampling and  $8 \pm 10\%$  for the 1,3-butadiene sampling train. All  
15 the rotameters were calibrated regularly using a Gilian II Gilibrator which in turn was annually serviced

1 and calibrated. The pumps were also calibrated annually by the supplier. In general, the agreement  
2 between flow rates recorded with rotameters and the Gilibrator was very satisfactory with an average  
3 correlation coefficient of  $0.92 \pm 0.10$ . The calibration of the rotameters showed a percentage deviation  
4 less than 15% from the Gilibrator.

5

### 6 **Analysis of ETS Urinary Biomarkers- Cotinine and trans-3'-hydroxycotinine**

7 Deuterium-labeled internal standards, cotinine-d<sub>9</sub> and *trans*-3'-hydroxycotinine-d<sub>9</sub> are used as internal  
8 standards. Chromatography is carried out using a 4.6 X 150 mm Phenomenex Synergi Polar RP  
9 (embedded phenoxypropyl group) column using a water-to-methanol gradient with 10 mM ammonium  
10 acetate/0.1% acetic acid buffer. The retention times are 7.1 minute for *trans*-3'-hydroxycotinine and 8.5  
11 minute for cotinine and they are baseline separated. Analytes and internal standards are all distinguished  
12 by unique mass transitions. The mass spectrometer is operated in the positive ion mode using atmospheric  
13 pressure chemical ionization. Quantitation is achieved using selected reaction monitoring (SRM) of the  
14 transitions *m/z* 177 to *m/z* 80 for cotinine, *m/z* 193 to *m/z* 80 for *trans*-3'-hydroxycotinine and the  
15 transitions *m/z* 186 to *m/z* 84 and *m/z* 202 to *m/z* 84 for the respective internal standards. Calibration  
16 curves were constructed from peak area ratios of the analyte to its internal standard using linear  
17 regression. Standard curves were linear over the concentration ranges 0.05 to 10 ng/mL for cotinine, and  
18 0.1 to 10 ng/mL for *trans*-3'-hydroxycotinine. For cotinine, between-run precision (percent coefficient of  
19 variation, *n* = 6) ranged from 0.7% to 7.4%, and accuracy (percent of expected values, *n* = 6) ranged from  
20 101% to 103% for concentrations ranging from 0.05 to 5 ng/mL. For *trans*-3'-hydroxycotinine, between-  
21 run precision (percent coefficient of variation, *n* = 6) ranged from 0.5 to 3.5%, and accuracy (percent of  
22 expected values, *n* = 6) ranged from 96% to 103% for concentrations ranging from 0.10 to 10 ng/mL. The  
23 limits of quantitation are 0.05 ng/mL (0.29 nmol/L) for cotinine, and 0.10 ng/mL (0.58 nmol/L) for *trans*-  
24 3'-hydroxycotinine.

**Table S2:** Number of samples of urine, VOC and PAH in all the selected subjects and for ETS and No ETS subjects. The number of concurrent

| No of Samples                         | All subjects<br>(ETS + No ETS) | No ETS subjects<br>( <sup>b</sup> ) | ETS subjects                   |                          |                           |
|---------------------------------------|--------------------------------|-------------------------------------|--------------------------------|--------------------------|---------------------------|
|                                       |                                |                                     | All ETS<br>(Low + High<br>ETS) | Low ETS ( <sup>c</sup> ) | High ETS ( <sup>d</sup> ) |
| Urine & VOC & PAH<br>concurrent       | 62                             | 41                                  | 19                             | 12                       | 9                         |
| Urine & VOC without<br>PAH concurrent | 24                             | 14                                  | 10                             | 5                        | 5                         |
| Total urine samples ( <sup>a</sup> )  | 86                             | 55                                  | 31                             | 19                       | 12                        |

(a) Total urine samples considered for data analysis is 86 from the original analysed 100. This number results from excluding the results of 8 smokers, and considering the mean value for 6 subjects whose urine from two different days was analysed.

(b) No ETS subjects were those who declared his/her No ETS status in the screening questionnaire, no ETS events were registered in the time-activity diaries and whose levels of 3-ethenylpyridine (3-EP) in air samples were  $<0.25 \mu\text{g}/\text{m}^3$  (maximum 3-EP concentration measured in the No-ETS subpopulation).

(c) ETS subjects were those who reported ETS events in the time-activity diary in the day were urine was collected. Those subjects whose 3-ETS was  $0.25 < 3\text{-EP} < 1.4 \mu\text{g}/\text{m}^3$  were classified as low ETS. The value of  $1.4 \mu\text{g}/\text{m}^3$  was selected as the frequency distribution of 3-ethenylpyridine in the ETS population appears to be bimodal, with the value of  $1.4 \mu\text{g}/\text{m}^3$  as the cutpoint between both modes (See main document for further details).

(d) ETS subjects were those who reported ETS events in the time-activity diary in the day were urine was collected. Those subjects whose 3-ETS was  $>1.4 \mu\text{g}/\text{m}^3$  were classified as high ETS.

**Table S3: Instrument Limits of Detection**

| Compound                         | Instrument Limit of Detection |
|----------------------------------|-------------------------------|
|                                  | Average                       |
| <b>VOC COMPOUNDS</b>             |                               |
|                                  | <b>(ng)</b>                   |
| n-Hexane                         | 0.030                         |
| Benzene                          | 0.044                         |
| Toluene                          | 0.053                         |
| Ethylbenzene                     | 0.037                         |
| p-Xylene                         | 0.074                         |
| m-Xylene                         | 0.071                         |
| Pyridine                         | 0.273                         |
| o-Xylene                         | 0.056                         |
| 1,3,5-Trimethylbenzene           | 0.056                         |
| Styrene                          | 0.042                         |
| p-Isopropyltoluene               | 0.024                         |
| 1,2,4-Trimethylbenzene           | 0.035                         |
| 3-Ethenylpyridine                | 0.620                         |
| Naphthalene                      | 0.024                         |
| 1,3-Butadiene                    | 0.030                         |
| <b>PAH COMPOUNDS</b>             |                               |
|                                  | <b>(pg/<math>\mu</math>L)</b> |
| Acenaphthylene                   | 1.0                           |
| Acenaphthene                     | 5.0                           |
| Fluorene                         | 5.0                           |
| Phenanthrene                     | 6.7                           |
| Anthracene                       | 1.4                           |
| Fluoranthene                     | 0.6                           |
| Pyrene                           | 0.5                           |
| Benzo(a)anthracene               | 0.2                           |
| Chrysene                         | 0.3                           |
| Benzo(b)fluoranthene             | 1.0                           |
| Benzo(k)fluoranthene             | 0.3                           |
| Benzo(a)pyrene                   | 0.3                           |
| Indeno(1,2,3-cd)pyrene           | 0.6                           |
| Dibenz(a,h)anthracene            | 0.3                           |
| Benzo(ghi)perylene               | 0.7                           |
| Coronene                         | 0.1                           |
| <b>URINARY BIOMARKERS</b>        |                               |
|                                  | <b>(pg/<math>\mu</math>L)</b> |
| Cotinine                         | 0.05                          |
| <i>Trans</i> -3'-Hydroxycotinine | 0.10                          |
| 2-Naphthol                       | 0.50                          |
| 1-Hydroxyfluorene                | 0.10                          |
| 2-Hydroxyfluorene                | 0.025                         |
| 3-Hydroxyfluorene                | 0.10                          |
| 1-Hydroxyphenanthrene            | 0.025                         |
| 2-Hydroxyphenanthrene            | 0.010                         |
| 3- + 4-Hydroxyphenanthrene       | 0.20                          |
| 1-Hydroxypyrene                  | 0.025                         |

**Table S4:** Subject characteristics description

| Characteristic                                           | Percentage of cases MATCH Project | Percentage of cases analyzed urine (%) |
|----------------------------------------------------------|-----------------------------------|----------------------------------------|
| <b>Gender</b>                                            |                                   |                                        |
| Female                                                   | 57                                | 55                                     |
| Male                                                     | 43                                | 45                                     |
| <b>Age</b>                                               |                                   |                                        |
| 18-25                                                    | 18                                | 18                                     |
| 26-35                                                    | 31                                | 28                                     |
| 36-45                                                    | 15                                | 16                                     |
| 46-55                                                    | 13                                | 14                                     |
| 56-65                                                    | 17                                | 18                                     |
| 66+                                                      | 6                                 | 6                                      |
| <b>Occupation category</b>                               |                                   |                                        |
| Administration/office worker                             | 48                                | 49                                     |
| Cleaning                                                 | 1                                 | 1                                      |
| Education                                                | 6                                 | 6                                      |
| Food/Hospitality                                         | 7                                 | 7                                      |
| Health                                                   | 7                                 | 7                                      |
| Housewife                                                | 4                                 | 4                                      |
| Manufacturing                                            | 1                                 | 1                                      |
| Police                                                   | 1                                 | 1                                      |
| Research and development                                 | 7                                 | 6                                      |
| Retired                                                  | 7                                 | 7                                      |
| Student                                                  | 10                                | 10                                     |
| Unemployed                                               | 1                                 | 1                                      |
| <b>Time spent per microenvironment</b>                   |                                   |                                        |
| Indoors at home                                          | 62                                | 64                                     |
| Indoors at work                                          | 16                                | 15                                     |
| Other indoors                                            | 12                                | 12                                     |
| Outdoors                                                 | 4                                 | 4                                      |
| In transit                                               | 6                                 | 6                                      |
| <b>Time spent traveling to workplace</b>                 |                                   |                                        |
| Not applicable                                           | 17                                | 17                                     |
| Less than 5 minutes                                      | 47                                | 48                                     |
| Less than 30 minutes                                     | 32                                | 31                                     |
| More than 30 minutes                                     | 4                                 | 4                                      |
| <b>ETS exposure</b>                                      |                                   |                                        |
| ETS exposed at least 1 day                               | 43                                | 43                                     |
| ETS exposed at home                                      | 12                                | 16                                     |
| Not ETS exposed at home                                  | 88                                | 84                                     |
| ETS exposed at work                                      | 8                                 | 9                                      |
| Not ETS exposed at work                                  | 92                                | 91                                     |
| <b>Activities relevant to VOC and PAH concentrations</b> |                                   |                                        |
| Cleaning                                                 | 61                                | 62                                     |
| Aerosol/Perfume use                                      | 55                                | 55                                     |
| Solvent use                                              | 8                                 | 7                                      |
| Candle burning                                           | 13                                | 13                                     |
| Photocopier/Printer                                      | 41                                | 41                                     |
| Lighted fire in fireplace                                | 11                                | 11                                     |
| Other fossil fuel use                                    | 4                                 | 4                                      |
| Refueling car                                            | 23                                | 23                                     |
| DIY-Hobbies                                              | 12                                | 12                                     |
| <b>Cooking characteristics</b>                           |                                   |                                        |
| Natural gas                                              | 47                                | 48                                     |
| Electricity                                              | 53                                | 52                                     |
| Use of cooker hood                                       | 36                                | 35                                     |
| No use of cooker hood                                    | 64                                | 65                                     |
| <b>Geographical location</b>                             |                                   |                                        |
| London                                                   | 11                                | 12                                     |
| West Midlands                                            | 79                                | 78                                     |
| Wales                                                    | 10                                | 10                                     |
| <b>Home location</b>                                     |                                   |                                        |
| Urban                                                    | 38                                | 36                                     |
| Suburban                                                 | 42                                | 43                                     |
| Rural                                                    | 20                                | 21                                     |
| <b>Other</b>                                             |                                   |                                        |
| Living in houses with attached garages                   | 16                                | 20                                     |
| Living in trafficked roadsides                           | 44                                | 43                                     |

**Table S5:** Concentrations of Urinary Biomarkers (ng mL<sup>-1</sup> and μmol mol<sup>-1</sup> creatinine), Selected VOC (μg.m<sup>-3</sup>), Parent PAH (ng m<sup>-3</sup>) and Non-Parent PAH (ng m<sup>-3</sup>) Personal Exposure Concentrations by Key Determinant

| Biomarker                                              | Cases<br>% | All subjects |      |            |      | Non ETS subjects |      |            |             | ETS subjects |       |                   |      |                   |       |        |       |       |
|--------------------------------------------------------|------------|--------------|------|------------|------|------------------|------|------------|-------------|--------------|-------|-------------------|------|-------------------|-------|--------|-------|-------|
|                                                        |            | Min/Max      |      | Arithmetic |      | Min/Max          |      | Arithmetic |             | Min/Max      |       | Arithmetic        |      |                   |       |        |       |       |
|                                                        |            | No<br>Cases  | Min  | Max        | Mean | SD               | GM   | GSD        | No<br>Cases | Min          | Max   | Mean <sup>a</sup> | SD   | GM <sup>(a)</sup> | GSD   |        |       |       |
| <b>Urinary Biomarker concentrations</b>                |            |              |      |            |      |                  |      |            |             |              |       |                   |      |                   |       |        |       |       |
| Co                                                     | 0          | 86           | 0.10 | 35.0       | 3.30 | 6.39             | 0.88 | 5.28       | 0.59        | 0.97         | 0.33  | 2.70              | 0.10 | 35.0              | 7.33  | 8.60   | 3.72  | 4.01  |
| Co/Creat                                               | 0          | 86           | 0.03 | 35.43      | 2.51 | 5.57             | 0.56 | 0.65       | 0.36        | 0.50         | 0.21  | 0.32              | 0.19 | 35.43             | 5.70  | 7.77   | 2.41  | 0.54  |
| T3HCot                                                 | 0          | 86           | 0.20 | 63.3       | 9.09 | 14.32            | 3.13 | 4.60       | 2.84        | 4.86         | 1.41  | 3.12              | 0.37 | 63.3              | 18.37 | 18.29  | 10.20 | 3.47  |
| T3HCof/Creat                                           | 0          | 86           | 0.10 | 61.03      | 5.25 | 8.80             | 1.84 | 0.50       | 1.51        | 2.19         | 0.83  | 0.31              | 4.19 | 61.03             | 10.80 | 11.64  | 6.03  | 0.40  |
| 2-Nap                                                  | 0          | 86           | 0.30 | 33.2       | 4.58 | 5.57             | 2.92 | 2.52       | 3.17        | 6.60         | 3.13  | 2.64              | 3.71 | 3.45              | 3.71  | 3.45   | 2.64  | 2.34  |
| 2-Nap/Creat                                            | 0          | 86           | 0.51 | 26.04      | 3.10 | 3.31             | 2.28 | 0.24       | 3.48        | 4.00         | 2.43  | 0.25              | 4.19 | 9.20              | 2.52  | 1.77   | 2.08  | 0.21  |
| 1-HFl                                                  | 87         | 11           | 0.10 | 0.7        | 0.23 | 0.21             | 0.17 | 2.08       | 0.7         | 0.28         | 0.19  | 2.63              | 0.10 | 0.2               | 0.16  | 0.05   | 0.15  | 1.46  |
| 1-HFl/Creat                                            | 87         | 11           | 0.03 | 0.36       | 0.12 | 0.11             | 0.08 | 0.25       | 0.68        | 0.14         | 0.09  | 0.32              | 0.57 | 0.06              | 0.17  | 0.08   | 0.05  | 0.07  |
| 2-HFl                                                  | 0          | 86           | 0.00 | 3.3        | 0.36 | 0.40             | 0.28 | 2.07       | 0.55        | 0.41         | 0.30  | 2.17              | 0.37 | 0.9               | 0.29  | 0.21   | 0.25  | 1.90  |
| 2-HFl/Creat                                            | 0          | 86           | 0.05 | 2.02       | 0.21 | 0.27             | 0.16 | 0.22       | 6.22        | 0.23         | 0.16  | 0.23              | 4.19 | 0.06              | 0.90  | 0.19   | 0.18  | 0.15  |
| 3-HFl                                                  | 56         | 38           | n.d. | 1.0        | 0.21 | 0.19             | 0.18 | 1.77       | 2.4         | 0.22         | 0.23  | 1.92              | 1.4  | n.d.              | 0.5   | 0.21   | 0.11  | 0.21  |
| 3-HFl/Creat                                            | 56         | 38           | 0.02 | 0.60       | 0.11 | 0.12             | 0.08 | 0.24       | 2.71        | 0.02         | 0.60  | 0.11              | 1.58 | 0.02              | 0.38  | 0.12   | 0.10  | 0.09  |
| 1-HPhe                                                 | 1          | 85           | n.d. | 1.4        | 0.30 | 0.31             | 0.22 | 2.21       | 5.4         | n.d.         | 1.3   | 0.29              | 0.27 | n.d.              | 1.4   | 0.32   | 0.37  | 0.22  |
| 1-HPhe/Creat                                           | 1          | 85           | 0.03 | 0.90       | 0.15 | 0.15             | 0.12 | 0.23       | 6.11        | 0.03         | 0.71  | 0.15              | 4.19 | 0.05              | 0.90  | 0.16   | 0.12  | 0.24  |
| 2-HPhe                                                 | 1          | 85           | n.d. | 0.5        | 0.12 | 0.12             | 0.14 | 1.66       | 5.5         | n.d.         | 0.5   | 0.12              | 1.14 | 1.63              | 0.5   | 0.12   | 0.13  | 0.14  |
| 2-HPhe/Creat                                           | 0          | 86           | 0.01 | 0.52       | 0.06 | 0.06             | 0.05 | 0.21       | 6.22        | 0.01         | 0.52  | 0.06              | 0.07 | 0.05              | 0.25  | 0.06   | 0.05  | 0.20  |
| 3+4-HPhe                                               | 1          | 85           | n.d. | 2.7        | 0.30 | 0.38             | 0.22 | 2.16       | 5.4         | n.d.         | 0.7   | 0.26              | 1.98 | 0.37              | 0.10  | 2.7    | 0.36  | 0.54  |
| 3+4-HPhe/Creat                                         | 1          | 85           | 0.03 | 1.28       | 0.16 | 0.18             | 0.12 | 0.23       | 6.11        | 0.03         | 0.70  | 0.13              | 4.19 | 0.05              | 1.28  | 0.18   | 0.24  | 0.24  |
| 1-HPyr                                                 | 1          | 85           | n.d. | 1.2        | 0.13 | 0.15             | 0.14 | 1.66       | 5.4         | n.d.         | 0.4   | 0.14              | 1.62 | 0.37              | n.d.  | 1.2    | 0.14  | 0.13  |
| 1-HPyr/Creat                                           | 1          | 85           | 0.01 | 0.34       | 0.06 | 0.05             | 0.05 | 0.19       | 6.11        | 0.01         | 0.34  | 0.06              | 0.05 | 0.20              | 0.29  | 0.06   | 0.05  | 0.19  |
| <b>Selected VOC Personal Exposure Concentrations</b>   |            |              |      |            |      |                  |      |            |             |              |       |                   |      |                   |       |        |       |       |
| 3-EP                                                   | 2          | 84           | 0.01 | 6.92       | 0.60 | 1.04             | 0.16 | 5.50       | 53          | 0.01         | 0.26  | 0.07              | 0.06 | 0.05              | 2.15  | 1.37   | 1.29  | 0.78  |
| Naph                                                   | 1          | 84           | 0.06 | 165.01     | 2.77 | 17.39            | 0.64 | 2.63       | 53          | 0.06         | 14.21 | 0.95              | 1.96 | 0.57              | 2.29  | 165.01 | 5.39  | 27.02 |
| BaP                                                    | 1          | 85           | n.d. | 5.73       | 0.58 | 1.01             | 0.22 | 4.28       | 54          | n.d.         | 5.73  | 0.50              | 1.03 | 0.16              | 4.41  | n.d.   | 5.48  | 0.99  |
| <b>Parent PAH Personal Exposure Concentrations</b>     |            |              |      |            |      |                  |      |            |             |              |       |                   |      |                   |       |        |       |       |
| Fl                                                     | 91         | 6            | 0.02 | 1.32       | 0.56 | 0.53             | 0.23 | 6.21       | 3           | 0.03         | 1.32  | 0.54              | 0.68 | 0.22              | 6.70  | 0.90   | 0.58  | 0.49  |
| Ph                                                     | 31         | 47           | 0.02 | 2.32       | 0.39 | 0.52             | 0.20 | 3.18       | 35          | 0.02         | 2.03  | 0.38              | 0.49 | 0.21              | 3.06  | 0.32   | 0.40  | 0.18  |
| Pyr                                                    | 21         | 54           | n.d. | 2.34       | 0.38 | 0.49             | 0.22 | 2.87       | 38          | 0.04         | 1.89  | 0.40              | 0.45 | 0.25              | 2.57  | n.d.   | 2.34  | 0.35  |
| <b>Non Parent PAH Personal Exposure Concentrations</b> |            |              |      |            |      |                  |      |            |             |              |       |                   |      |                   |       |        |       |       |
| Ac                                                     | 46         | 37           | n.d. | 3.21       | 0.45 | 0.65             | 0.20 | 4.19       | 25          | n.d.         | 3.21  | 0.42              | 0.66 | 0.18              | 4.27  | 2.25   | 0.51  | 0.66  |
| Ace                                                    | 47         | 36           | n.d. | 3.69       | 0.42 | 0.62             | 0.24 | 3.43       | 28          | n.d.         | 3.69  | 0.43              | 0.68 | 0.25              | 3.17  | 1.07   | 0.41  | 0.39  |
| Ant                                                    | 34         | 45           | n.d. | 0.6        | 0.09 | 0.13             | 0.04 | 3.28       | 34          | n.d.         | 0.53  | 0.09              | 0.12 | 0.05              | 3.28  | 0.60   | 0.09  | 0.17  |
| Fluo                                                   | 22         | 53           | 0.02 | 3.7        | 0.61 | 0.76             | 0.37 | 2.80       | 39          | 0.02         | 3.64  | 0.60              | 0.70 | 0.74              | 3.70  | 0.64   | 0.35  | 0.31  |
| BaA                                                    | 6          | 64           | n.d. | 0.97       | 0.13 | 0.21             | 0.06 | 3.27       | 46          | n.d.         | 0.97  | 0.10              | 0.18 | 0.05              | 3.03  | 0.78   | 0.19  | 0.25  |
| Chry                                                   | 1          | 67           | n.d. | 2.94       | 0.37 | 0.52             | 0.22 | 2.72       | 48          | 0.02         | 1.47  | 0.26              | 0.29 | 0.18              | 2.34  | 2.94   | 0.80  | 0.38  |
| BbF                                                    | 3          | 66           | 0.01 | 2.24       | 0.28 | 0.38             | 0.16 | 2.94       | 47          | 0.02         | 1.49  | 0.23              | 0.31 | 0.14              | 2.69  | 0.01   | 2.24  | 0.22  |
| BkF                                                    | 0          | 68           | n.d. | 1.59       | 0.24 | 0.31             | 0.15 | 2.50       | 49          | n.d.         | 1.37  | 0.21              | 0.29 | 0.13              | 2.41  | 1.59   | 0.31  | 0.51  |
| BaP                                                    | 4          | 65           | n.d. | 1.19       | 0.18 | 0.27             | 0.09 | 3.03       | 46          | n.d.         | 1.19  | 0.16              | 0.28 | 0.08              | 2.89  | 0.02   | 0.80  | 0.23  |
| Ind                                                    | 0          | 68           | 0.01 | 1.48       | 0.17 | 0.23             | 0.10 | 2.84       | 49          | 0.01         | 1.48  | 0.17              | 0.26 | 0.09              | 2.84  | 0.16   | 0.13  | 0.11  |
| BghiP                                                  | 21         | 54           | n.d. | 0.2        | 0.03 | 0.05             | 0.03 | 2.54       | 38          | n.d.         | 0.19  | 0.03              | 0.04 | 0.02              | 2.43  | 0.20   | 0.05  | 0.04  |
| DahA                                                   | 0          | 68           | 0.01 | 2.01       | 0.25 | 0.35             | 0.14 | 2.90       | 49          | 0.02         | 2.01  | 0.25              | 0.39 | 0.13              | 2.84  | 0.01   | 0.82  | 0.26  |
| Cor                                                    | 12         | 60           | n.d. | 0.94       | 0.15 | 0.20             | 0.09 | 2.57       | 42          | 0.02         | 0.94  | 0.16              | 0.24 | 0.09              | 2.80  | 0.39   | 0.14  | 0.10  |
| Σ Low MW                                               | 0          | 68           | n.d. | 5.71       | 0.92 | 1.34             | 0.69 | 3.07       | 49          | n.d.         | 5.71  | 0.84              | 1.24 | 0.60              | 3.06  | 4.84   | 1.12  | 1.59  |
| [Naph - An]                                            | 0          | 68           | n.d. | 8.75       | 1.27 | 1.58             | 0.65 | 3.76       | 49          | n.d.         | 8.75  | 1.14              | 1.34 | 0.61              | 3.62  | 8.75   | 1.62  | 2.07  |
| Σ Medium MW                                            | 0          | 68           | 0.03 | 8.27       | 1.26 | 1.66             | 0.71 | 2.94       | 49          | 0.03         | 8.27  | 1.15              | 1.74 | 0.62              | 2.90  | 5.74   | 1.55  | 1.44  |
| [Fluo - Chry]                                          | 0          | 68           | 0.03 | 8.27       | 1.26 | 1.66             | 0.71 | 2.94       | 49          | 0.03         | 8.27  | 1.15              | 1.74 | 0.62              | 2.90  | 5.74   | 1.55  | 1.44  |
| Σ High MW                                              | 0          | 69           | n.d. | 15.02      | 3.27 | 3.40             | 2.00 | 2.92       | 50          | n.d.         | 13.7  | 2.93              | 3.20 | 1.82              | 2.79  | 15.02  | 4.15  | 3.80  |
| [B(b)F - Cor]                                          | 0          | 69           | n.d. | 15.02      | 3.27 | 3.40             | 2.00 | 2.92       | 50          | n.d.         | 13.7  | 2.93              | 3.20 | 1.82              | 2.79  | 15.02  | 4.15  | 3.80  |
| Σ 16                                                   | 0          | 69           | n.d. | 15.02      | 3.27 | 3.40             | 2.00 | 2.92       | 50          | n.d.         | 13.7  | 2.93              | 3.20 | 1.82              | 2.79  | 15.02  | 4.15  | 3.80  |
| [Naph - B(ghi)P]                                       | 0          | 69           | n.d. | 15.02      | 3.27 | 3.40             | 2.00 | 2.92       | 50          | n.d.         | 13.7  | 2.93              | 3.20 | 1.82              | 2.79  | 15.02  | 4.15  | 3.80  |

(a) Bold figures indicate that concentrations in ETS subset are significantly different than the non ETS subset at the 0.05 level.



**Table S6:** Correlation of Urinary Biomarkers with ETS Selected VOC Compounds, Parent PAH and Non-Parent PAH Personal Exposures (Pearson R, logged database) (Sample Size VOC≤86, PAH ≤68)

|                                    | Cotinine /<br>Creatinine   | Trans-3'-Hydroxycotinine<br>/ Creatinine | 2-Hydroxyfluorene /<br>Creatinine | 1-Hydroxypyrene/<br>Creatinine |
|------------------------------------|----------------------------|------------------------------------------|-----------------------------------|--------------------------------|
| <b>VOC Selected Compounds</b>      |                            |                                          |                                   |                                |
| 3-Ethenyl Pyridine                 | <b>0.74<sup>(**)</sup></b> | <b>0.68<sup>(**)</sup></b>               | 0.12                              | 0.1                            |
| Naphthalene (gas phase)            | 0.05                       | -0.03                                    | 0.12                              | 0.01                           |
| 1,3-Butadiene                      | <b>0.43<sup>(**)</sup></b> | <b>0.42<sup>(**)</sup></b>               | 0.1                               | <b>0.23<sup>(*)</sup></b>      |
| <b>PAH Parent Compounds</b>        |                            |                                          |                                   |                                |
| Fluorene                           | -0.26                      | 0.07                                     | -0.33                             | 0.3                            |
| Phenanthrene                       | 0.13                       | 0.09                                     | 0.22                              | 0.24                           |
| Pyrene                             | 0.02                       | 0.03                                     | 0.24                              | 0.26                           |
| <b>PAH Non Parent Compounds</b>    |                            |                                          |                                   |                                |
| Benzo(a)anthracene                 | <b>0.28<sup>(*)</sup></b>  | <b>0.25<sup>(*)</sup></b>                | 0.13                              | 0                              |
| Chrysene                           | <b>0.44<sup>(**)</sup></b> | <b>0.43<sup>(**)</sup></b>               | 0.21                              | 0.12                           |
| Benzo(b)fluoranthene               | <b>0.36<sup>(**)</sup></b> | <b>0.34<sup>(**)</sup></b>               | 0.18                              | 0.2                            |
| Benzo(k)fluoranthene               | <b>0.38<sup>(**)</sup></b> | <b>0.38<sup>(**)</sup></b>               | 0.21                              | 0.19                           |
| Benzo(a)pyrene                     | <b>0.3<sup>(*)</sup></b>   | <b>0.29<sup>(*)</sup></b>                | 0.23                              | 0.18                           |
| Indeno(1,2,3-cd)pyrene             | 0.04                       | 0.07                                     | 0.18                              | 0.14                           |
| Dibenz(a,h)anthracene              | <b>0.29<sup>(*)</sup></b>  | <b>0.25<sup>(*)</sup></b>                | 0                                 | -0.12                          |
| Benzo(ghi)perylene                 | <b>0.23<sup>(*)</sup></b>  | <b>0.26<sup>(*)</sup></b>                | 0.12                              | 0.12                           |
| Coronene                           | 0.19                       | 0.19                                     | 0.06                              | 0.07                           |
| Sum of low MW PAH [Naph - An]      | 0.16                       | 0.14                                     | 0.18                              | 0.12                           |
| Sum of medium MW PAH [Fluo - Chry] | 0.18                       | 0.23                                     | <b>0.25<sup>(*)</sup></b>         | 0.17                           |
| Sum of high MW PAH [B(b)F - Cor]   | <b>0.28<sup>(*)</sup></b>  | <b>0.31<sup>(*)</sup></b>                | 0.15                              | 0.09                           |
| Sum of 16PAH [Naph - B(ghi)P]      | 0.17                       | 0.22                                     | <b>0.24<sup>(*)</sup></b>         | 0.2                            |

(a) Bold figures represent that both variable significantly correlate at the 0.05 level.
